# Supplementary material
Source: PubMed Central journal article supplement (PMC6389392)
Supplement: NIHMS1511813-supplement-1.pdf [file NIHMS1511813-supplement-1.pdf]

**Supplemental Table 1. Codes from the PheWAS of RNP positive vs. RNP negative SLE subjects adjusted for age and race.**

| <b>PheWAS codes</b>                         | <b>Phenotype present<br/>(≥ 2 or more<br/>instances of the<br/>PheWAS code)<sup>a</sup></b> | <b>Phenotype<br/>absent<br/>(0 instances of<br/>the PheWAS<br/>code)<sup>a</sup></b> | <b>Adjusted Odds<br/>Ratio for age and<br/>race<br/>(95% Confidence<br/>Interval)</b>   | <b>p<sup>b</sup></b> |
|---------------------------------------------|---------------------------------------------------------------------------------------------|--------------------------------------------------------------------------------------|-----------------------------------------------------------------------------------------|----------------------|
| <b>Codes favoring RNP positive subjects</b> |                                                                                             |                                                                                      |                                                                                         |                      |
| Chronic kidney disease, Stage I or II       | 44                                                                                          | 434                                                                                  | <b>RNP positive:</b><br>2.51<br>(1.25 – 5.01)<br><br><b>RNP negative:</b><br>1.00 (ref) | 0.009                |
| Peripheral vascular disease                 | 57                                                                                          | 609                                                                                  | 2.18<br>(1.16 – 4.10)                                                                   | 0.02                 |
| Disorder of skin and subcutaneous tissue    | 21                                                                                          | 609                                                                                  | 3.15<br>(1.18 – 8.39)                                                                   | 0.02                 |
| Rash and other nonspecific skin eruption    | 92                                                                                          | 481                                                                                  | 1.79<br>(1.08 – 2.97)                                                                   | 0.02                 |
| Inflammatory arthritis                      | 107                                                                                         | 406                                                                                  | 1.69<br>(1.03 – 2.78)                                                                   | 0.04                 |
| <b>Codes favoring RNP negative subjects</b> |                                                                                             |                                                                                      |                                                                                         |                      |
| Neurological disorders                      | 56                                                                                          | 549                                                                                  | 0.37<br>(0.17 – 0.81)                                                                   | 0.01                 |
| Acute sinusitis                             | 50                                                                                          | 478                                                                                  | 0.29<br>(0.11 – 0.78)                                                                   | 0.01                 |
| Myalgia and myositis unspecified            | 179                                                                                         | 424                                                                                  | 0.58<br>(0.36 – 0.93)                                                                   | 0.02                 |
| Nausea and vomiting                         | 107                                                                                         | 492                                                                                  | 0.54<br>(0.31 – 0.92)                                                                   | 0.02                 |
| Nonspecific chest pain                      | 208                                                                                         | 387                                                                                  | 0.60<br>(0.39 – 0.93)                                                                   | 0.02                 |
| Vitamin                                     | 119                                                                                         | 426                                                                                  | 0.52                                                                                    | 0.02                 |

|                                              |     |     |                       |      |
|----------------------------------------------|-----|-----|-----------------------|------|
| deficiency                                   |     |     | (0.30 – 0.92)         |      |
| Overweight                                   | 78  | 538 | 0.49<br>(0.26 – 0.93) | 0.03 |
| Asthma                                       | 48  | 546 | 0.38<br>(0.16 – 0.91) | 0.03 |
| Depression                                   | 107 | 445 | 0.56<br>(0.32 – 0.99) | 0.05 |
| Nonspecific findings on examination of blood | 57  | 489 | 0.40<br>(0.16 – 0.99) | 0.05 |

<sup>a</sup>Phenotype present indicates subjects who had the code listed on at least 2 instances vs. phenotype absent

indicates subjects who did not have the code or related codes. Subjects with 1 instance of a code are excluded, so the total number of subjects for each PheWAS code does not add up to the 1097 SLE subjects. There are 425 subjects with a missing RNP.

<sup>b</sup>Codes listed met a Bonferroni  $p < 0.05$ .

**Supplemental Table 2. Codes from the PheWAS of RNP positive vs. RNP negative SLE subjects adjusted for age, race, and dsDNA.**

| <b>PheWAS codes</b>                                           | <b>Phenotype present<br/>(≥ 2 or more<br/>instances of the<br/>PheWAS code)<sup>a</sup></b> | <b>Phenotype<br/>absent<br/>(0 instances of<br/>the PheWAS<br/>code)<sup>a</sup></b> | <b>Adjusted Odds<br/>Ratio for age,<br/>race, and dsDNA<br/>(95% Confidence<br/>Interval)</b> | <b>p<sup>b</sup></b> |
|---------------------------------------------------------------|---------------------------------------------------------------------------------------------|--------------------------------------------------------------------------------------|-----------------------------------------------------------------------------------------------|----------------------|
| <b>Codes favoring RNP positive subjects</b>                   |                                                                                             |                                                                                      |                                                                                               |                      |
| Rheumatoid arthritis and other inflammatory polyarthropathies | 102                                                                                         | 383                                                                                  | <b>RNP positive:</b><br>1.92<br>(1.14 – 3.22)<br><br><b>RNP negative:</b><br>1.00 (ref)       | 0.01                 |
| Chronic kidney disease, stage I or II                         | 43                                                                                          | 407                                                                                  | 2.38<br>(1.15 – 4.91)                                                                         | 0.02                 |
| Rash and other nonspecific skin eruption                      | 89                                                                                          | 452                                                                                  | 1.76<br>(1.04 – 2.98)                                                                         | 0.03                 |
| Peripheral vascular disease                                   | 50                                                                                          | 483                                                                                  | 2.07<br>(1.04 – 4.14)                                                                         | 0.04                 |
| Other specified cardiac dysrhythmias                          | 27                                                                                          | 462                                                                                  | 2.57<br>(1.05 – 6.30)                                                                         | 0.04                 |
| <b>Codes favoring RNP negative subjects</b>                   |                                                                                             |                                                                                      |                                                                                               |                      |
| Acute sinusitis                                               | 50                                                                                          | 450                                                                                  | 0.30<br>(0.11 – 0.82)                                                                         | 0.02                 |
| Vitamin deficiency                                            | 114                                                                                         | 401                                                                                  | 0.50<br>(0.28 – 0.91)                                                                         | 0.02                 |
| Neurological disorders                                        | 53                                                                                          | 519                                                                                  | 0.40<br>(0.18 – 0.90)                                                                         | 0.03                 |
| Myalgia and myositis unspecified                              | 171                                                                                         | 400                                                                                  | 0.60<br>(0.37 – 0.97)                                                                         | 0.04                 |
| Depression                                                    | 101                                                                                         | 427                                                                                  | 0.52<br>(0.28 – 0.96)                                                                         | 0.04                 |

|                      |     |     |                       |      |
|----------------------|-----|-----|-----------------------|------|
| Vitamin D deficiency | 93  | 401 | 0.53<br>(0.28 – 0.99) | 0.05 |
| Nausea and vomiting  | 102 | 464 | 0.57<br>(0.33 – 0.98) | 0.05 |

<sup>a</sup>Phenotype present indicates subjects who had the code listed on at least 2 instances vs. phenotype absent indicates subjects who did not have the code or related codes. Subjects with 1 instance of a code are excluded, so the total number of subjects for each PheWAS code does not add up to the 1097 SLE subjects. There are 425 subjects with a missing RNP.

<sup>b</sup>Codes listed met a Bonferroni  $p < 0.05$ .

**Supplemental Table 3. Codes from the PheWAS of Smith positive vs. negative SLE subjects adjusted for age and race.**

| <b>PheWAS codes</b>                                                      | <b>Phenotype<br/>present<br/>(≥ 2 or more<br/>instances of the<br/>PheWAS code)<sup>a</sup></b> | <b>Phenotype<br/>absent<br/>(0 instances of<br/>the PheWAS<br/>code)<sup>a</sup></b> | <b>Adjusted Odds Ratio<br/>for age and race<br/>(95% Confidence<br/>Interval)</b>         | <b>p<sup>b</sup></b> |
|--------------------------------------------------------------------------|-------------------------------------------------------------------------------------------------|--------------------------------------------------------------------------------------|-------------------------------------------------------------------------------------------|----------------------|
| <b>Codes favoring Smith positive subjects</b>                            |                                                                                                 |                                                                                      |                                                                                           |                      |
| Ascites<br>(non-malignant)                                               | 21                                                                                              | 514                                                                                  | <b>Smith positive:</b> 4.18<br>(1.64 – 10.69)<br><br><b>Smith negative:</b> 1.00<br>(ref) | 0.003                |
| Disorder of skin<br>and subcutaneous<br>tissue                           | 21                                                                                              | 623                                                                                  | 3.73<br>(1.40 – 9.94)                                                                     | 0.009                |
| Rash and other<br>nonspecific skin<br>eruption                           | 93                                                                                              | 490                                                                                  | 1.97<br>(1.15 – 3.36)                                                                     | 0.01                 |
| Nephritis and<br>nephropathy in<br>diseases classified<br>elsewhere      | 87                                                                                              | 441                                                                                  | 1.97<br>(1.14 – 3.43)                                                                     | 0.02                 |
| Chemotherapy                                                             | 26                                                                                              | 600                                                                                  | 2.86<br>(1.21 – 6.75)                                                                     | 0.02                 |
| Cardiac<br>dysrhythmias                                                  | 105                                                                                             | 498                                                                                  | 1.92<br>(1.12 – 3.29)                                                                     | 0.02                 |
| Hyperpotassemia                                                          | 35                                                                                              | 474                                                                                  | 2.48<br>(1.16 – 5.30)                                                                     | 0.02                 |
| Chronic<br>glomerulonephritis                                            | 28                                                                                              | 441                                                                                  | 2.62<br>(1.13 – 6.07)                                                                     | 0.02                 |
| Nephritis and<br>nephropathy<br>without mention of<br>glomerulonephritis | 94                                                                                              | 441                                                                                  | 1.86<br>(1.08 – 3.20)                                                                     | 0.03                 |
| Arrhythmia                                                               | 21                                                                                              | 498                                                                                  | 3.13<br>(1.15 – 8.54)                                                                     | 0.03                 |
| Other diseases of                                                        | 99                                                                                              | 502                                                                                  | 1.81                                                                                      | 0.03                 |

|                                               |     |     |                       |      |
|-----------------------------------------------|-----|-----|-----------------------|------|
| lung                                          |     |     | (1.07 – 3.06)         |      |
| Nephritis;<br>nephrosis; renal<br>sclerosis   | 115 | 441 | 1.74<br>(1.05 – 2.90) | 0.03 |
| Hypotension                                   | 33  | 569 | 2.40<br>(1.07 – 5.35) | 0.03 |
| Other specified<br>cardiac<br>dysrhythmias    | 31  | 498 | 2.50<br>(1.07 – 5.89) | 0.04 |
| Diseases of white<br>blood cells              | 60  | 492 | 1.92<br>(1.02 – 3.64) | 0.04 |
| Congestive heart<br>failure                   | 49  | 507 | 2.08<br>(1.01 – 4.28) | 0.05 |
| <b>Codes favoring Smith negative subjects</b> |     |     |                       |      |
| Vitamin deficiency                            | 120 | 436 | 0.43<br>(0.21 – 0.86) | 0.02 |

<sup>a</sup>Phenotype present indicates subjects who had the code listed on at least 2 instances vs. phenotype absent indicates subjects who did not have the code or related codes. Subjects with 1 instance of a code are excluded, so the total number of subjects for each PheWAS code does not add up to the 1097 SLE subjects. There are 410 subjects with a missing Smith.

<sup>b</sup>Codes listed met a Bonferroni  $p < 0.05$ .

**Supplemental Table 4. Codes from the PheWAS of Smith positive vs. negative SLE subjects adjusted for age, race, and dsDNA.**

| <b>PheWAS codes</b>                                           | <b>Phenotype<br/>present<br/>(≥ 2 or more<br/>instances of the<br/>PheWAS code)<sup>a</sup></b> | <b>Phenotype<br/>absent<br/>(0 instances of<br/>the PheWAS<br/>code)<sup>a</sup></b> | <b>Adjusted Odds Ratio<br/>for age, race, and<br/>dsDNA<br/>(95% Confidence<br/>Interval)</b> | <b>p<sup>b</sup></b> |
|---------------------------------------------------------------|-------------------------------------------------------------------------------------------------|--------------------------------------------------------------------------------------|-----------------------------------------------------------------------------------------------|----------------------|
| <b>Codes favoring Smith positive subjects</b>                 |                                                                                                 |                                                                                      |                                                                                               |                      |
| Cardiac dysrhythmias                                          | 98                                                                                              | 474                                                                                  | <b>Smith positive:</b> 2.14<br>(1.23 – 3.73)<br><br><b>Smith negative:</b> 1.00<br>(ref)      | 0.007                |
| Rash and other nonspecific skin eruption                      | 90                                                                                              | 462                                                                                  | 2.06<br>(1.19 – 3.57)                                                                         | 0.01                 |
| Other specified cardiac dysrhythmias                          | 28                                                                                              | 474                                                                                  | 3.05<br>(1.25 - 7.44)                                                                         | 0.01                 |
| Ascites (non-malignant)                                       | 20                                                                                              | 489                                                                                  | 3.40<br>(1.27 - 9.09)                                                                         | 0.01                 |
| Arrhythmia (cardiac) NOS                                      | 20                                                                                              | 474                                                                                  | 3.49<br>(1.24 – 9.85)                                                                         | 0.02                 |
| Chemotherapy                                                  | 26                                                                                              | 566                                                                                  | 2.83<br>(1.18 – 6.77)                                                                         | 0.02                 |
| Atrial fibrillation                                           | 24                                                                                              | 474                                                                                  | 3.45<br>(1.21 – 9.83)                                                                         | 0.02                 |
| Hyperpotassemia                                               | 34                                                                                              | 450                                                                                  | 2.45<br>(1.12 – 5.37)                                                                         | 0.03                 |
| Rheumatoid arthritis and other inflammatory polyarthropathies | 107                                                                                             | 391                                                                                  | 1.88<br>(1.08 – 3.28)                                                                         | 0.03                 |
| Atrial fibrillation and flutter                               | 25                                                                                              | 474                                                                                  | 3.13<br>(1.09 – 8.36)                                                                         | 0.03                 |
| Congestive heart failure                                      | 46                                                                                              | 484                                                                                  | 2.24<br>(1.06 – 4.74)                                                                         | 0.03                 |
| Diseases of white                                             | 57                                                                                              | 464                                                                                  | 2.04                                                                                          | 0.04                 |

|                                               |     |     |                       |      |
|-----------------------------------------------|-----|-----|-----------------------|------|
| blood cells                                   |     |     | (1.05 – 3.97)         |      |
| Other diseases of lung                        | 93  | 477 | 1.79<br>(1.03 – 3.10) | 0.04 |
| Disorder of skin and subcutaneous tissue      | 20  | 590 | 2.95<br>(1.05 – 8.31) | 0.04 |
| Elevated white blood cell count               | 25  | 464 | 2.67<br>(1.04 – 6.85) | 0.04 |
| Hypotension                                   | 31  | 541 | 2.37<br>(1.02 – 5.51) | 0.05 |
| <b>Codes favoring Smith negative subjects</b> |     |     |                       |      |
| Vitamin deficiency                            | 115 | 412 | 0.42<br>(0.21 – 0.86) | 0.02 |

<sup>a</sup>Phenotype present indicates subjects who had the code listed on at least 2 instances vs. phenotype absent indicates subjects who did not have the code or related codes. Subjects with 1 instance of a code are excluded, so the total number of subjects for each PheWAS code does not add up to the 1097 SLE subjects. There are 410 subjects with a missing Smith.

<sup>b</sup>Codes listed met a Bonferroni  $p < 0.05$ .



**Supplemental Table 5. Codes from the PheWAS of SSA positive vs. negative SLE subjects.**

| <b>PheWAS codes</b>                         | <b>Phenotype<br/>present<br/>(≥ 2 or more<br/>instances of the<br/>PheWAS code)<sup>a</sup></b> | <b>Phenotype<br/>absent<br/>(0 instances of<br/>the PheWAS<br/>code)<sup>a</sup></b> | <b>Adjusted Odds Ratio<br/>for age and race<br/>(95% Confidence<br/>Interval)</b>        | <b>p<sup>b</sup></b> |
|---------------------------------------------|-------------------------------------------------------------------------------------------------|--------------------------------------------------------------------------------------|------------------------------------------------------------------------------------------|----------------------|
| <b>Codes favoring SSA negative subjects</b> |                                                                                                 |                                                                                      |                                                                                          |                      |
| Disorders of lipid metabolism               | 124                                                                                             | 580                                                                                  | <b>Smith negative:</b> 0.44<br>(0.27 – 0.74)<br><br><b>Smith positive:</b> 1.00<br>(ref) | 0.002                |
| Cough                                       | 126                                                                                             | 395                                                                                  | 0.48<br>(0.29 – 0.79)                                                                    | 0.004                |
| Diabetes mellitus                           | 68                                                                                              | 635                                                                                  | 0.37<br>(0.19 – 0.74)                                                                    | 0.005                |
| Vitamin D deficiency                        | 104                                                                                             | 497                                                                                  | 0.47<br>(0.28 – 0.79)                                                                    | 0.005                |
| Hyperlipidemia                              | 112                                                                                             | 580                                                                                  | 0.48<br>(0.29 – 0.81)                                                                    | 0.006                |
| Spondylosis and allied disorders            | 41                                                                                              | 629                                                                                  | 0.27<br>(0.10 – 0.71)                                                                    | 0.008                |
| Cervicalgia                                 | 61                                                                                              | 630                                                                                  | 0.38<br>(0.18 – 0.78)                                                                    | 0.009                |
| Vitamin deficiency                          | 125                                                                                             | 497                                                                                  | 0.56<br>(0.35 – 0.89)                                                                    | 0.02                 |
| Gout and other crystal arthropathies        | 26                                                                                              | 714                                                                                  | 0.16<br>(0.04 – 0.72)                                                                    | 0.02                 |
| Substance addiction and disorders           | 26                                                                                              | 648                                                                                  | 0.18<br>(0.04 – 0.78)                                                                    | 0.02                 |
| Lump or mass in breast                      | 26                                                                                              | 641                                                                                  | 0.25<br>(0.07 – 0.83)                                                                    | 0.02                 |
| Gout                                        | 24                                                                                              | 714                                                                                  | 0.19<br>(0.04 – 0.83)                                                                    | 0.03                 |
| Neurological disorders                      | 56                                                                                              | 630                                                                                  | 0.46<br>(0.23 – 0.93)                                                                    | 0.03                 |
| Chronic airway obstruction                  | 34                                                                                              | 625                                                                                  | 0.33<br>(0.12 – 0.90)                                                                    | 0.03                 |

|                                                |     |     |                       |      |
|------------------------------------------------|-----|-----|-----------------------|------|
| Chemotherapy                                   | 25  | 665 | 0.26<br>(0.08 – 0.89) | 0.03 |
| Osteoarthritis NOS                             | 67  | 533 | 0.47<br>(0.23 – 0.94) | 0.03 |
| Other disorders of synovium, tendon, and bursa | 49  | 530 | 0.44<br>(0.21 – 0.94) | 0.03 |
| Other immunological findings                   | 136 | 422 | 0.62<br>(0.39 – 0.96) | 0.03 |
| Mood disorders                                 | 119 | 514 | 0.61<br>(0.38 – 0.97) | 0.04 |
| Mixed hyperlipidemia                           | 53  | 580 | 0.48<br>(0.23 – 0.97) | 0.04 |
| Abnormal findings on mammogram or breast exam  | 56  | 641 | 0.49<br>(0.25 – 0.98) | 0.04 |
| Depression                                     | 111 | 514 | 0.61<br>(0.37 – 0.99) | 0.05 |
| Spondylosis without myelopathy                 | 21  | 629 | 0.22<br>(0.05 – 0.97) | 0.05 |
| Irregular menstrual cycle                      | 26  | 561 | 0.33<br>(0.11 – 0.99) | 0.05 |
| Obstructive sleep apnea                        | 29  | 597 | 0.34<br>(0.11 – 0.99) | 0.05 |
| Osteoarthritis                                 | 162 | 533 | 0.61<br>(0.38 – 0.99) | 0.05 |
| Osteoarthritis, generalized                    | 85  | 533 | 0.52<br>(0.27 – 0.99) | 0.05 |

<sup>a</sup>Phenotype present indicates subjects who had the code listed on at least 2 instances vs. phenotype absent

indicates subjects who did not have the code or related codes. Subjects with 1 instance of a code are excluded, so the total number of subjects for each PheWAS code does not add up to the 1097 SLE subjects. There are 339 subjects with missing SSA.

<sup>b</sup>Codes listed met a Bonferroni  $p < 0.05$ .

**Supplemental Table 6. Significant codes from the PheWAS of SSB positive vs. negative SLE subjects.**

| <b>PheWAS codes</b>                         | <b>Phenotype present<br/>(≥ 2 or more instances of the PheWAS code)<sup>a</sup></b> | <b>Phenotype absent<br/>(0 instances of the PheWAS code)<sup>a</sup></b> | <b>Adjusted Odds Ratio for race<br/>(95% Confidence Interval)</b>                    | <b>p<sup>b</sup></b> |
|---------------------------------------------|-------------------------------------------------------------------------------------|--------------------------------------------------------------------------|--------------------------------------------------------------------------------------|----------------------|
| <b>Codes favoring SSB positive subjects</b> |                                                                                     |                                                                          |                                                                                      |                      |
| Pericarditis                                | 46                                                                                  | 638                                                                      | <b>SSB positive:</b> 2.24<br>(1.16 – 4.35)<br><br><b>SSB negative:</b> 1.00<br>(ref) | 0.02                 |
| Visual disturbances                         | 25                                                                                  | 670                                                                      | 2.70<br>(1.16 – 6.30)                                                                | 0.02                 |
| Pleurisy; pleural effusion                  | 77                                                                                  | 562                                                                      | 1.84<br>(1.05 – 3.23)                                                                | 0.01                 |
| <b>Codes favoring SSB negative subjects</b> |                                                                                     |                                                                          |                                                                                      |                      |
| Vitamin D deficiency                        | 102                                                                                 | 487                                                                      | 0.38<br>(0.18 – 0.78)                                                                | 0.008                |
| Vitamin deficiency                          | 124                                                                                 | 487                                                                      | 0.47<br>(0.25 – 0.86)                                                                | 0.02                 |
| Sleep disorders                             | 80                                                                                  | 584                                                                      | 0.42<br>(0.19 – 0.94)                                                                | 0.03                 |
| Allergic rhinitis                           | 69                                                                                  | 537                                                                      | 0.41<br>(0.17 – 0.98)                                                                | 0.04                 |
| Superficial cellulitis and abscess          | 57                                                                                  | 606                                                                      | 0.38<br>(0.15 – 0.99)                                                                | 0.05                 |

<sup>a</sup>Phenotype present indicates subjects who had the code listed on at least 2 instances vs. phenotype absent indicates subjects who did not have the code or related codes. Subjects with 1 instance of a code are excluded, so the total number of subjects for each PheWAS code does not add up to the 1097 SLE subjects. There are 409 subjects with missing SSB.

<sup>b</sup>Codes listed met a Bonferroni  $p < 0.05$ .
